# Supplementary material for: Synthesis of Nanostructured TiO2 Microparticles with High Surface Area
Source: MDPI journal article supplement (doi:10.3390/catal11121512), 2021-12-11
Supplement: s1 [file s1]

Archive with 1 entries (1 files):
- catalysts-1491128-supplementary.pdf
